# Supplementary material for: A Halloween gene noppera-bo encodes a glutathione S-transferase essential for ecdysteroid biosynthesis via regulating the behaviour of cholesterol in Drosophila
Source: PubMed Central journal article supplement — Sci Rep. 2014 Oct 10;4:6586. doi: 10.1038/srep06586 (PMC4192634; doi:10.1038/srep06586), 2014-10-10
Supplement: srep06586-s1.pdf [file srep06586-s1.pdf]

## Supplementary information

**A Halloween gene *noppera-bo* encodes a glutathione *S*-transferase essential for ecdysteroid biosynthesis via regulating the behaviour of cholesterol in *Drosophila***

Sora Enya, Tomotsune Ameku, Fumihiko Igarashi, Masatoshi Iga, Hiroshi Kataoka, Tetsuro Shinoda and Ryusuke Niwa

**Supplementary figure S1. *in situ* RNA hybridisation analysis in embryos.**

Lateral (a-f) and ventral (g) views are shown. (a-f) *nobo* mRNA was observed in epidermal cells during stages 5-14. (e) At stage 11, the *nobo* signal was detected in the amnioserosa (arrow), which is thought to synthesise ecdysteroids. (g) At stage 16 and later, the *nobo* signal was detected in the PG cells (arrowheads). An inset with a higher magnification of the PG. Scale bar: 100  $\mu$ m.

**Supplementary figure S2. PCR genotyping analysis of first instar larvae of the wild-type Oregon R, *nobo*<sup>KO</sup> heterozygous animals (balanced with *CyO*) and *nobo*<sup>KO</sup> homozygous animals rescued by maternally supplied cholesterol and 7dC.**

*nobo*<sup>KO</sup> homozygous animals were collected as GFP-negative offspring of *nobo*<sup>KO</sup>/*CyO*-GFP parents that were fed cholesterol (C) or 7dC. For each genotype, PCR products from three single first instar larvae were used for agarose gel electrophoresis. The PCR primers for genotyping are illustrated in Fig. 2a ('F' and 'R') and described in Supplementary table S3. Black and Magenta arrowheads indicate PCR bands corresponding to the wild-type (2260 bp) and *nobo*<sup>KO</sup> (4047 bp) alleles, respectively. Lanes 1-3, Oregon R without any sterol supplements; lanes 4-6, *nobo*<sup>KO</sup>/*CyO* without any sterol supplements; lanes 7-9, *nobo*<sup>KO</sup>/*nobo*<sup>KO</sup> first instar larvae that were maternally supplied with cholesterol; and lanes 10-12, *nobo*<sup>KO</sup>/*nobo*<sup>KO</sup> first instar larvae that were maternally supplied with 7dC.

**Supplementary figure S3. A phylogenetic tree shows the relationship between Nobo and other GST proteins.**

(a) The rootless tree that was generated based on the entire amino acid sequence of *Drosophila melanogaster* Nobo and the other 277 GST proteins by the neighbour-joining method through the MEGA5 program <sup>68</sup>. The names and GenBank accession numbers of GST proteins in this tree are listed in Supplementary table S4. Aa, *Aedes aegypti*; Ag, *Anopheles gambiae*; Tc, *Tribolium castaneum*; Cq, *Culex quinquefasciatus*; Dm, *Drosophila melanogaster*; Bm, *Bombyx mori*; Ph, *Pediculus humanus corporis*; Nv, *Nasonia vitripennis*; Am, *Apis mellifera*; Ap, *Acyrtosiphon pisum*; Dp, *Danaus plexippus*; Ce, *Caenorhabditis elegans*; Hs, *Homo sapiens*. Pink and blue areas indicate clades that include *nobo* subfamily genes and human GSTA3 family genes, respectively.

(b) A phylogenetic clade of *nobo* subfamily genes, which was derived from (a). Each number indicates the bootstrap value for each branch.

A scale bar shows the number of amino acid substitutions per site between two sequences.

**Supplementary Reference**

68. Tamura, K. *et al.* MEGA5: molecular evolutionary genetics analysis using maximum likelihood, evolutionary distance, and maximum parsimony methods. *Mol Biol Evol* **28**, 2731–2739 (2011).

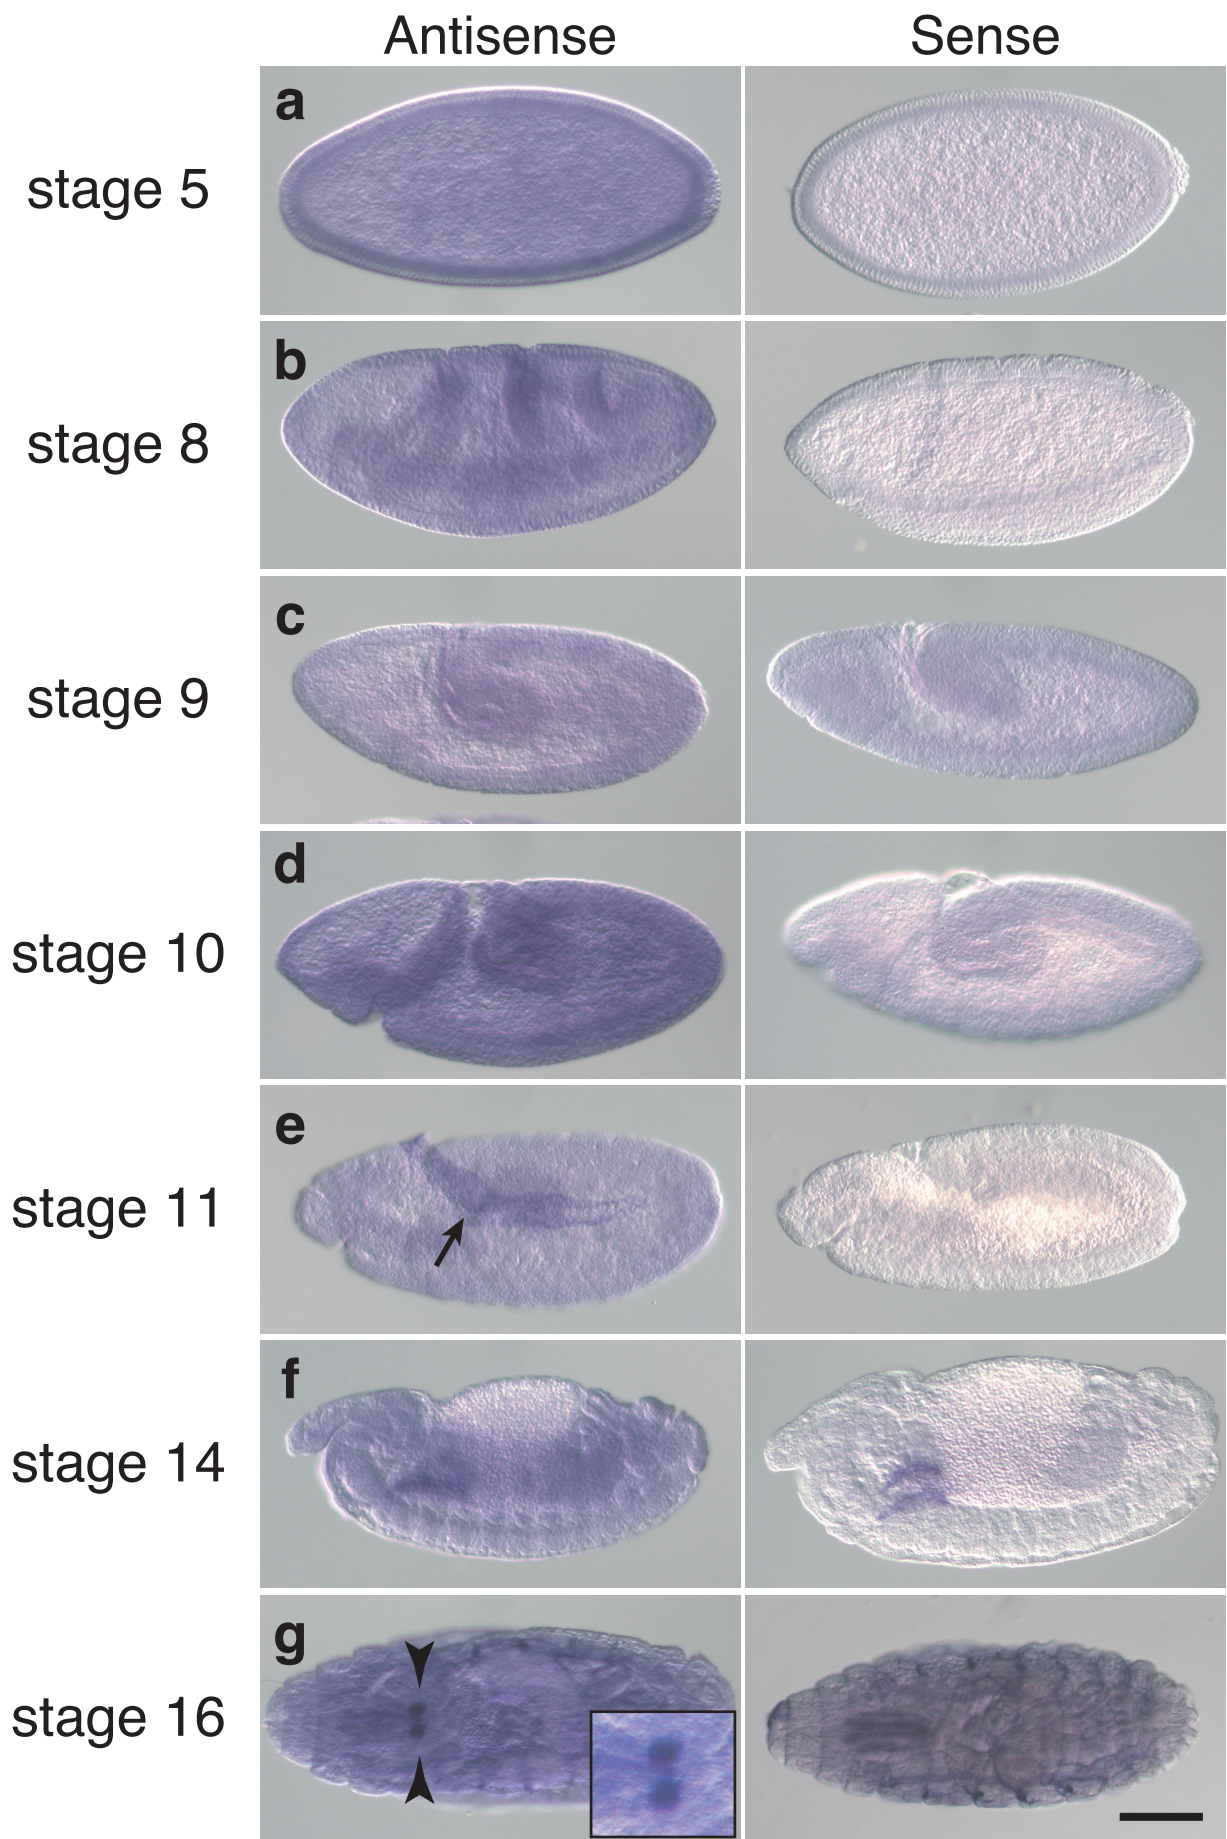

Enya et al.  
Supplementary figure S1

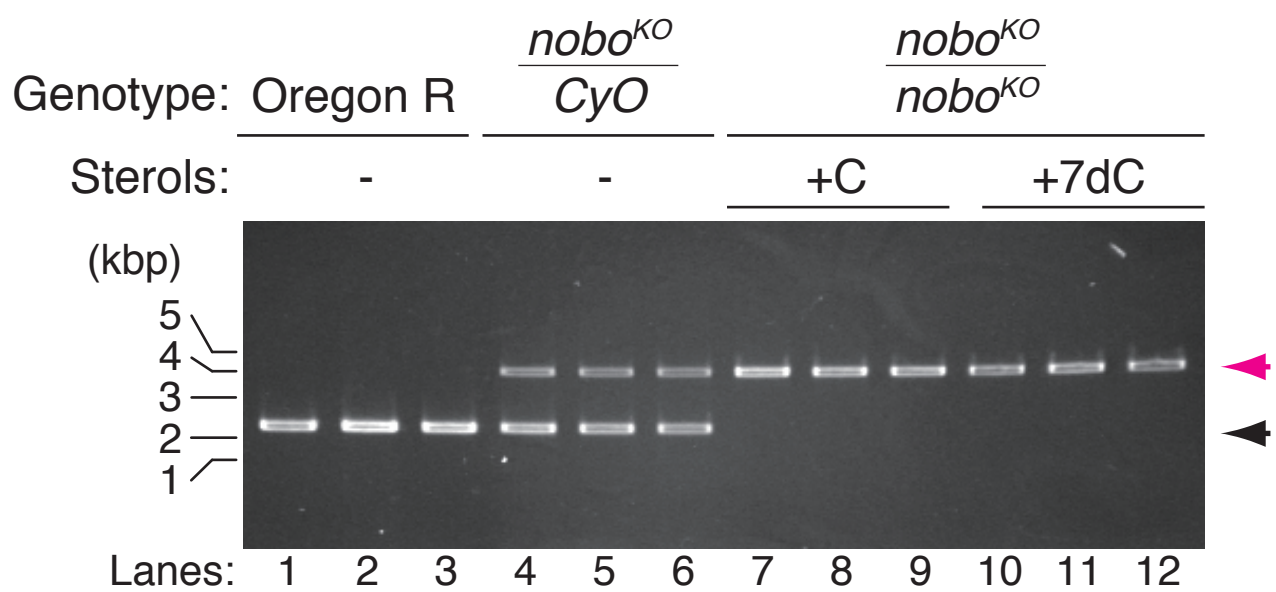

Enya et al.  
Supplementary figure S2

**a**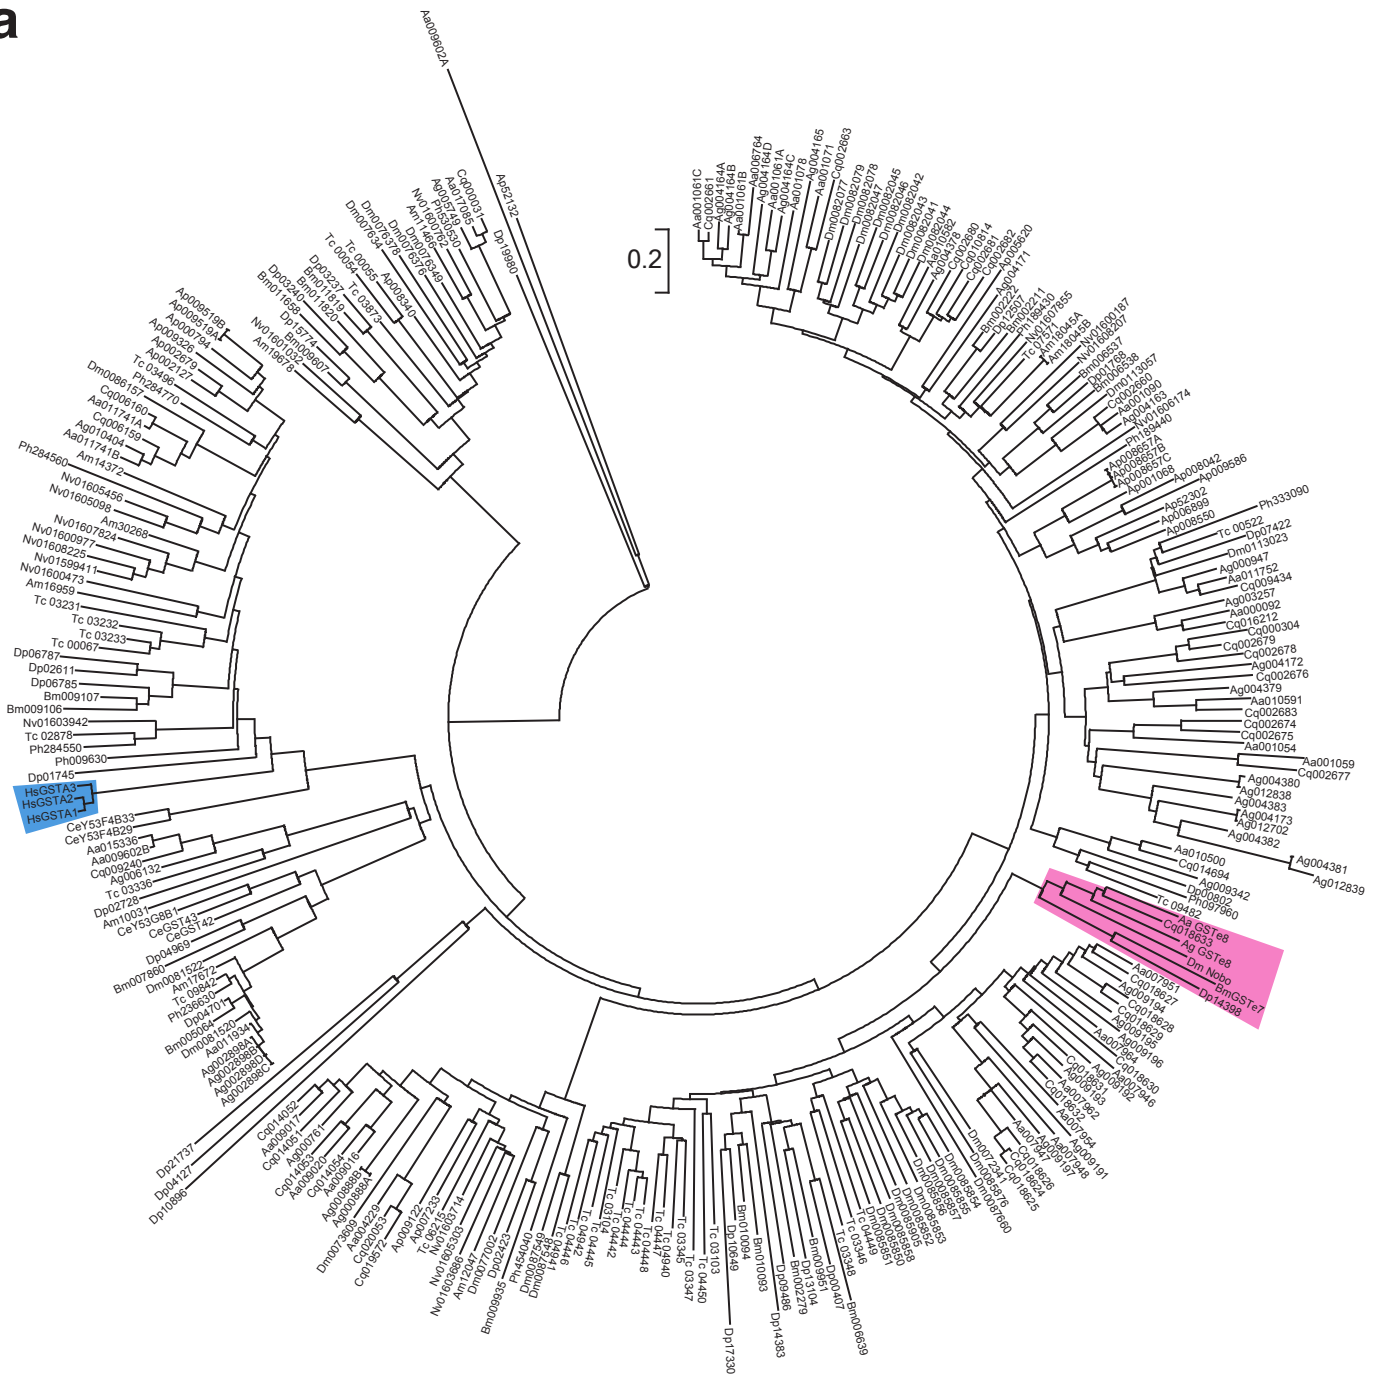**b**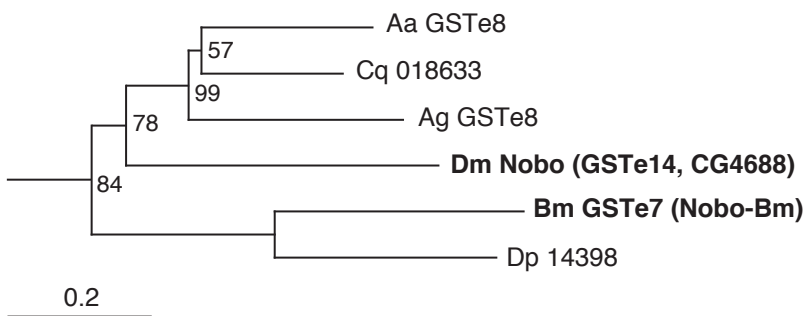

**Supplementary table S1. Fly strains used for transgenic rescue for *nobo*<sup>KO</sup>**

The lethality of *nobo*<sup>KO</sup> animals with the expression of *nobo* and other GST genes. Numerical data are the same as shown in Table 1. Each cross of parental males with parental females is indicated. Genetic markers of the *CyO* and *TM6B* balancer chromosomes are *Cy*<sup>-</sup> and *Hu*<sup>-</sup>, respectively. *nobo*<sup>KO</sup>/*nobo*<sup>KO</sup> and viable control *nobo*<sup>KO</sup>/+ adults were *Cy*<sup>+</sup> *Hu*<sup>+</sup> and *Cy*<sup>-</sup> *Hu*<sup>+</sup>, respectively.

| Back-ground               | Transgene         | Parents (males)                                                                                 | Parents (females)                                                                            | <i>Cy</i> <sup>+</sup> ,<br><i>Hu</i> <sup>+</sup> | <i>Cy</i> <sup>-</sup> ,<br><i>Hu</i> <sup>+</sup> |
|---------------------------|-------------------|-------------------------------------------------------------------------------------------------|----------------------------------------------------------------------------------------------|----------------------------------------------------|----------------------------------------------------|
| <i>nobo</i> <sup>KO</sup> | <i>nobo</i> #1    | <i>w</i> ; <i>nobo</i> <sup>KO</sup> / <i>CyO</i> ;<br><i>phm-GAL4</i> #22/ <i>TM6B</i>         | <i>w</i> ; <i>nobo</i> <sup>KO</sup> / <i>CyO</i> ;<br><i>P{UAS-nobo-HA}</i> #1/ <i>TM6B</i> | 101                                                | 220                                                |
|                           | <i>nobo</i> #2    | <i>w</i> ; <i>nobo</i> <sup>KO</sup> / <i>CyO</i> ;<br><i>phm-GAL4</i> #22/ <i>TM6B</i>         | <i>w</i> ; <i>nobo</i> <sup>KO</sup> / <i>CyO</i> ;<br><i>P{UAS-nobo-HA}</i> #2/ <i>TM6B</i> | 124                                                | 255                                                |
|                           | <i>nobo</i> #3    | <i>w</i> ; <i>nobo</i> <sup>KO</sup> / <i>CyO</i> ;<br><i>P{UAS-nobo-HA}</i> #3/ <i>TM6B</i>    | <i>w</i> ; <i>nobo</i> <sup>KO</sup> / <i>CyO</i> ;<br><i>phm-GAL4</i> #22/ <i>TM6B</i>      | 46                                                 | 102                                                |
|                           | <i>nobo-Bm</i> #1 | <i>w</i> ; <i>nobo</i> <sup>KO</sup> / <i>CyO</i> ;<br><i>phm-GAL4</i> #22/ <i>TM6B</i>         | <i>w</i> ; <i>nobo</i> <sup>KO</sup><br><i>P{UAS-nobo-Bm-HA}</i> #1/ <i>CyO</i>              | 85                                                 | 377                                                |
|                           | <i>nobo-Bm</i> #5 | <i>w</i> ; <i>nobo</i> <sup>KO</sup> / <i>CyO</i> ;<br><i>P{UAS-nobo-Bm-HA}</i> #5/ <i>TM6B</i> | <i>w</i> ; <i>nobo</i> <sup>KO</sup> / <i>CyO</i> ;<br><i>phm-GAL4</i> #22/ <i>TM6B</i>      | 77                                                 | 348                                                |
|                           | <i>CG6673B</i>    | <i>w</i> ; <i>nobo</i> <sup>KO</sup> / <i>CyO</i> ;<br><i>P{UAS-CG6673B}</i> / <i>TM6B</i>      | <i>w</i> ; <i>nobo</i> <sup>KO</sup> / <i>CyO</i> ;<br><i>phm-GAL4</i> #22/ <i>TM6B</i>      | 0                                                  | 105                                                |
|                           | <i>GSTe4</i>      | <i>w</i> ; <i>nobo</i> <sup>KO</sup> / <i>CyO</i> ;<br><i>phm-GAL4</i> #22/ <i>TM6B</i>         | <i>w</i> ; <i>P{UAS-GSTe4}</i> attP40<br><i>nobo</i> <sup>KO</sup> / <i>CyO</i>              | 0                                                  | 102                                                |
|                           | <i>GSTe12</i>     | <i>w</i> ; <i>nobo</i> <sup>KO</sup> / <i>CyO</i> ;<br><i>phm-GAL4</i> #22/ <i>TM6B</i>         | <i>w</i> ; <i>P{UAS-GSTe12}</i> attP40<br><i>nobo</i> <sup>KO</sup> / <i>CyO</i>             | 0                                                  | 117                                                |

**Supplementary table S2. Fly strains used for transgenic rescue of *nobo* RNAi**

The lethality of *nobo* RNAi animals with the expression of *nobo* and other GST genes. Numerical data are the same as shown in Table 1. Each cross of parental males with parental females is indicated. Genetic markers of the *CyO*, *TM6B* and *TM3* balancer chromosomes are *Cy<sup>-</sup>*, *Hu<sup>-</sup>* and *Sb<sup>-</sup>*, respectively. *nobo<sup>KO</sup>* RNAi and viable non-RNAi adults were *Cy<sup>+</sup> Hu<sup>+</sup> Sb<sup>+</sup>* and *Hu<sup>-</sup>*, respectively.

| Back-ground                | Transgene        | Parents (males)                                          | Parents (females)                                                               | <i>CyO<sup>+</sup></i> ,<br><i>Hu<sup>+</sup></i> , <i>Sb<sup>+</sup></i> | <i>Hu<sup>-</sup></i> |
|----------------------------|------------------|----------------------------------------------------------|---------------------------------------------------------------------------------|---------------------------------------------------------------------------|-----------------------|
| <i>nobo</i><br><i>RNAi</i> | <i>nobo-Bm#1</i> | <i>w</i> ; <i>UAS-dicer2</i> ;<br><i>phm-GAL4#22/TM6</i> | <i>w</i> ; <i>P{UAS-nobo-Bm-HA}#1/CyO</i> ;<br><i>P{UAS-nobo-IR}#40316/TM6B</i> | 120                                                                       | 498                   |
|                            | <i>nobo-Bm#2</i> | <i>w</i> ; <i>UAS-dicer2</i> ;<br><i>phm-GAL4#22/TM6</i> | <i>w</i> ; <i>P{UAS-nobo-Bm-HA}#2/CyO</i> ;<br><i>P{UAS-nobo-IR}#40316/TM6B</i> | 105                                                                       | 350                   |
|                            | <i>GSTe4</i>     | <i>w</i> ; <i>UAS-dicer2</i> ;<br><i>phm-GAL4#22/TM6</i> | <i>w</i> ; <i>P{UAS-GSTe4}attP40/CyO</i> ;<br><i>P{UAS-nobo-IR}#40316/TM6B</i>  | 0                                                                         | 92                    |
|                            | <i>GSTe12</i>    | <i>w</i> ; <i>UAS-dicer2</i> ;<br><i>phm-GAL4#22/TM6</i> | <i>w</i> ; <i>P{UAS-GSTe12}attP40/CyO</i> ;<br><i>P{UAS-nobo-IR}#40316/TM6B</i> | 0                                                                         | 105                   |
|                            | <i>sepia</i>     | <i>w</i> ; <i>UAS-dicer2</i> ;<br><i>phm-GAL4#22/TM6</i> | <i>w</i> ; <i>P{UAS-sepia}</i> ;<br><i>P{UAS-nobo-IR}#40316/TM6B</i>            | 0                                                                         | 249                   |
|                            | <i>CG6673A</i>   | <i>w</i> ; <i>UAS-dicer2</i> ;<br><i>phm-GAL4#22/TM6</i> | <i>w</i> ; <i>P{UAS-CG6673A}</i> ;<br><i>P{UAS-nobo-IR}#40316/TM6B</i>          | 0                                                                         | 120                   |
|                            | <i>CG6673B</i>   | <i>w</i> ; <i>UAS-dicer2</i> ;<br><i>phm-GAL4#22/TM6</i> | <i>w</i> ; <i>P{UAS-nobo-IR}#101884</i> ;<br><i>P{UAS-CG6673B}/TM6B</i>         | 0                                                                         | 278                   |
|                            | <i>CG6662</i>    | <i>w</i> ; <i>UAS-dicer2</i> ;<br><i>phm-GAL4#22/TM6</i> | <i>w</i> ; <i>P{UAS-CG6662}</i> ;<br><i>P{UAS-nobo-IR}#40316/TM3 Sb</i>         | 0                                                                         | 107                   |



**Supplementary table S3. List of primers used in this study.**

Each gene specific sequence is indicated in upper case letters. The regions that are recognised by restriction enzymes are underlined.

| Purpose                                           | Name of primers               | Sequence (5' > 3')                                                  | Remarks        |
|---------------------------------------------------|-------------------------------|---------------------------------------------------------------------|----------------|
| qRT-PCR primers for quantifying <i>nobo</i>       | nobo-qRT-PCR-F2               | CGGTCCGCAGTTGCCTTATGC                                               |                |
|                                                   | nobo-qRT-PCR-R2               | GGA CTAGGGTGGGAACACTGTGCTG                                          |                |
| Vector construction to overexpress <i>nobo</i>    | UAS-nobo-HA-F                 | <u>gtcagatct</u> ATGTCTCAGCCCAAGCCGATTTTG                           |                |
|                                                   | UAS-nobo-HA-R                 | actgcgccgcccCTCCACCTTCTCGGTGACTACCGCTG                              |                |
| Vector construction to overexpress <i>nobo-Bm</i> | UAS-BmGSTe7-HA-F              | <u>gtcagatct</u> ATGTCCATTGTTTCGGTGTAATATG                          |                |
|                                                   | UAS-BmGSTe7-HA-R              | actgcgccgcccGTTTGGCTTGTAAAGACTCATAAAATA                             |                |
| Vector construction to overexpress <i>GSTe4</i>   | GstE4-CDS-F                   | agtcagatctATGGGTAAGATATCGCTATAC                                     |                |
|                                                   | GstE4-CDS-R                   | tcagtctagaTTACGAAACTATGGTGAAAG                                      |                |
| Vector construction to overexpress <i>GSTe12</i>  | CG16936-CDS-F                 | agtcagatctATGTCAAAGCCAGCTCTGTATT                                    |                |
|                                                   | CG16936-CDS-R                 | tcagtctagaCTACTTGCCACGGTTTTCTG                                      |                |
| Vector construction to knock-out <i>nobo</i>      | noboKO5F- <i>XhoI</i>         | CTCGAGTAGCCTGATGCTGTCTCCAAGC                                        |                |
|                                                   | noboKO5R-loxP- <i>NotI</i>    | GCGGCCGCATAACTTCGTATAGCATACATTATACGAAGTTATTAGCCACAGTACTGATTGATGGTGG |                |
|                                                   | noboKO3F-loxP- <i>HindIII</i> | AAGCTTATAACTTCGTATAATGTATGCTATACGAAGTTATCACCGAGAAGGTGGAGTAGCACTAG   |                |
|                                                   | noboKO3R- <i>SphI</i>         | GCATGCCCAAACGTAAAATCCTGAGACGTAAGC                                   |                |
| Genotyping for <i>nobo</i> <sup>KO</sup> allele   | noboKO-genotype               | GGCGCGAGAGGTACATTGTTTAGC                                            | 'F' in Fig. 2a |
|                                                   | noboKO-genotype-R             | CACTTGGCAGCTGGAAAGTCAGAG                                            | 'R' in Fig. 2a |

**Supplementary table 4. GST proteins used for generating the phylogenetic tree in Fig. 1h and Supplementary fig. S2.**

Red characters indicate *Nobo* sub-clade.

| Species              | Gene ID                  | Cluster    |
|----------------------|--------------------------|------------|
| <i>Aedes aegypti</i> | AAEL000092               | GSTx1      |
|                      | AAEL004229               | GSTt4      |
|                      | AAEL001054               | GSTd4      |
|                      | AAEL001059               | GSTd3      |
|                      | AAEL001071               | GSTd5      |
|                      | AAEL001078               | GSTd2      |
|                      | AAEL001061               | GSTd1      |
|                      | AAEL001090               | GSTd7      |
|                      | AAEL006764               | Delta-GST  |
|                      | <b>AAEL007955</b>        | GSTe8      |
|                      | AAEL007954               | GSTe1      |
|                      | AAEL007962               | GSTe4      |
|                      | AAEL007951               | GSTe2      |
|                      | AAEL007964               | GSTe5      |
|                      | AAEL007948               | GSTe7      |
|                      | AAEL007946               | GSTe6      |
|                      | AAEL007947               | GSTe3      |
|                      | AAEL009020               | GSTt3      |
|                      | AAEL009017               | GSTt1      |
|                      | AAEL009016               | GSTt2      |
|                      | AAEL009602               |            |
|                      | AAEL010500               | GSTx2      |
|                      | AAEL010582               | GSTd11     |
|                      | AAEL010591               | GSTd6      |
|                      | AAEL011741               | GSTs1      |
|                      | AAEL011752               | GSTi1      |
|                      | AAEL011934               | GSTz1      |
|                      | AAEL015336               | GST        |
|                      | AAEL017085               | GSTo1      |
|                      | <i>Anopheles gambiae</i> | AGAP005749 |
| AGAP006132           |                          | GST        |
| AGAP002898           |                          | GSTZ1      |
| AGAP003257           |                          | GSTU2      |
| AGAP004163-PB        |                          | GSTD7      |
| AGAP004164-PC        |                          | GSTD1      |
| AGAP004165           |                          | GSTD2      |
| AGAP004171           |                          | GSTD8      |
| AGAP004172           | Delta-GST                |            |

|                     |            |                        |
|---------------------|------------|------------------------|
|                     | AGAP004173 | GSTD5                  |
|                     | AGAP004378 | GSTD11                 |
|                     | AGAP004379 | GSTD6                  |
|                     | AGAP004380 | GSTD12                 |
|                     | AGAP004381 | GSTD4                  |
|                     | AGAP004382 | GSTD3                  |
|                     | AGAP004383 | GSTD10                 |
|                     | AGAP010404 | GSTS1                  |
|                     | AGAP009190 | GSTE8/U4               |
|                     | AGAP009191 | GSTE6                  |
|                     | AGAP009192 | GSTE5                  |
|                     | AGAP009193 | GSTE4                  |
|                     | AGAP009194 | GSTE2                  |
|                     | AGAP009195 | GSTE1                  |
|                     | AGAP009196 | GSTE7                  |
|                     | AGAP009197 | GSTE3                  |
|                     | AGAP009342 | GSTU3                  |
|                     | AGAP000761 | GSTT1                  |
|                     | AGAP000888 | GSTT2                  |
|                     | AGAP000947 | GSTU1                  |
|                     | AGAP012702 | Delta-GST              |
|                     | AGAP012838 | Delta-GST              |
|                     | AGAP012839 | Partial;Delta-GST      |
| Tribolium castaneum | Tc_04450   | Epsilon-GST            |
|                     | Tc_04449   | Epsilon-GST            |
|                     | Tc_04448   | Epsilon-GST            |
|                     | Tc_04447   | Epsilon-GST            |
|                     | Tc_04940   | Epsilon-GST            |
|                     | Tc_04941   | Epsilon-GST            |
|                     | Tc_04942   | Epsilon-GST            |
|                     | Tc_04446   | Epsilon-GST            |
|                     | Tc_04445   | Epsilon-GST            |
|                     | Tc_04444   | Epsilon-GST            |
|                     | Tc_04443   | Epsilon-GST            |
|                     | Tc_04442   | Epsilon-GST            |
|                     | Tc_00522   | Theta-GST excluded     |
|                     | Tc_03231   | Sigma-GST              |
|                     | Tc_03232   | Sigma-GST              |
|                     | Tc_03233   | Sigma-GST              |
|                     | Tc_03336   | N-terminal domain only |
|                     | Tc_03104   | Partial; Epsilon-GST   |
|                     | Tc_03345   | Epsilon-GST            |
|                     | Tc_03346   | Epsilon-GST            |

|                        |                   |                                             |
|------------------------|-------------------|---------------------------------------------|
|                        | Tc_03347          | Partial; Epsilon-GST                        |
|                        | Tc_03348          | Epsilon-GST                                 |
|                        | Tc_03103          | Epsilon-GST                                 |
|                        | Tc_03496          | Sigma-GST                                   |
|                        | Tc_02878          | Sigma-GST                                   |
|                        | Tc_00067          | Sigma-GST                                   |
|                        | Tc_00055          | Omega-GST                                   |
|                        | Tc_00054          | Omega-GST                                   |
|                        | Tc_03873          | Omega-GST                                   |
|                        | Tc_07571          | Delta-GST                                   |
|                        | Tc_09482          | Epsilon-GST                                 |
|                        | Tc_09842          | Zeta-GST                                    |
|                        | Tc_06215          | Theta-GST                                   |
| Culex quinquefasciatus | CPIJ000031        | Omega-GST                                   |
|                        | CPIJ006159        | Sigma-GST                                   |
|                        | CPIJ006160        | Sigma-GST                                   |
|                        | CPIJ018624        | Epsilon-GST                                 |
|                        | CPIJ018625        | Epsilon-GST                                 |
|                        | CPIJ018626        | Epsilon-GST                                 |
|                        | CPIJ018627        | Epsilon-GST                                 |
|                        | CPIJ018628        | Partial; Epsilon-GST                        |
|                        | CPIJ018629        | Epsilon-GST                                 |
|                        | CPIJ018630        | Epsilon-GST                                 |
|                        | CPIJ018631        | Epsilon-GST                                 |
|                        | CPIJ018632        | Epsilon-GST                                 |
|                        | <b>CPIJ018633</b> | Epsilon-GST                                 |
|                        | CPIJ019572        | Theta-GST                                   |
|                        | CPIJ000304        | Delta-GST                                   |
|                        | CPIJ009434        | Delta-GST                                   |
|                        | CPIJ009240        | GST                                         |
|                        | CPIJ020053        | Theta-GST                                   |
|                        | CPIJ010814        | Partial; Delta-GST clusters with CPIJ002680 |
|                        | CPIJ002660        | Delta-GST                                   |
|                        | CPIJ002661        | Delta-GST                                   |
|                        | CPIJ002663        | Delta-GST                                   |
|                        | CPIJ002674        | Delta-GST                                   |
|                        | CPIJ002675        | Delta-GST                                   |
|                        | CPIJ002676        | Delta-GST                                   |
|                        | CPIJ002677        | C-terminal domain only                      |
|                        | CPIJ002678        | Delta-GST                                   |
|                        | CPIJ002679        | Delta-GST                                   |
|                        | CPIJ002680        | Delta-GST                                   |
|                        | CPIJ002681        | Delta-GST                                   |

|                         |                    |                                   |
|-------------------------|--------------------|-----------------------------------|
|                         | CPIJ002682         | Partial; Delta-GST                |
|                         | CPIJ002683         | Delta-GST                         |
|                         | CPIJ014051         | Theta-GST                         |
|                         | CPIJ014052         | Theta-GST                         |
|                         | CPIJ014053         | Theta-GST                         |
|                         | CPIJ014054         | Theta-GST                         |
|                         | CPIJ014694         | Delta-GST                         |
|                         | CPIJ016212         | Delta-GST                         |
|                         | TBLASTN            | Cp_GSTZ; overlaps with CPIJ009709 |
| Drosophila melanogaster | FBpp0087660        | Epsilon-GST                       |
|                         | FBpp0087548        | Theta-GST                         |
|                         | FBpp0087549        | Theta-GST                         |
|                         | <b>FBpp0086857</b> | Epsilon-GST                       |
|                         | FBpp0086157        | GSTS1                             |
|                         | FBpp0085905        | GSTE10                            |
|                         | FBpp0085850        | GSTE1                             |
|                         | FBpp0085851        | GSTE2                             |
|                         | FBpp0085852        | GSTE3                             |
|                         | FBpp0085853        | GSTE4                             |
|                         | FBpp0085854        | GSTE5                             |
|                         | FBpp0085855        | GSTE6                             |
|                         | FBpp0085856        | GSTE7                             |
|                         | FBpp0085857        | GSTE8                             |
|                         | FBpp0085858        | GSTE9                             |
|                         | FBpp0085876        | Epsilon-GST                       |
|                         | FBpp0072341        | Epsilon-GST                       |
|                         | FBpp0076348        | Omega-GST                         |
|                         | FBpp0076349        | se;Omega                          |
|                         | FBpp0076378        | Omega                             |
|                         | FBpp0076376        | Omega-GST                         |
|                         | FBpp0113023        | gfzf;Delta/Epsilon superclass2    |
|                         | FBpp0081522        | Zeta-GST                          |
|                         | FBpp0081520        | Zeta-GST                          |
|                         | FBpp0082079        | GSTD10                            |
|                         | FBpp0082078        | GSTD9                             |
|                         | FBpp0082077        | GSTD1                             |
|                         | FBpp0082041        | GSTD2                             |
|                         | FBpp0082042        | GSTD3                             |
|                         | FBpp0082043        | GSTD4                             |
|                         | FBpp0082044        | GSTD5                             |
|                         | FBpp0082045        | GSTD6                             |
|                         | FBpp0082046        | GSTD7                             |
|                         | FBpp0082047        | GSTD8                             |

|                     |                |                                       |
|---------------------|----------------|---------------------------------------|
|                     | FBpp0113057    | Delta-GST                             |
|                     | FBpp0073609    | Theta-GST                             |
|                     | FBpp0077002    | Theta-GST                             |
| Bombyx mori         | BGIBMGA002222  | GSTd2                                 |
|                     | BGIBMGA002211  | GSTd3                                 |
|                     | BGIBMGA002279  | GSTe2                                 |
|                     | BGIBMGA005064  | GSTz1                                 |
|                     | BGIBMGA006537  | GSTd1                                 |
|                     | BGIBMGA006538  | Delta-GST                             |
|                     | BGIBMGA006639  | Partial(C-terminal domain only)       |
|                     | BGIBMGA007860  | Partial;divergent;GSTz2               |
|                     | BGIBMGA009106  | GSTs1                                 |
|                     | BGIBMGA009107  | GSTs2                                 |
|                     | BGIBMGA009607  | Partial;GSTo3;condirmed by SilkDB     |
|                     | BGIBMGA009935  | GSTt1                                 |
|                     | BGIBMGA009951  | GSTe3                                 |
|                     | BGIBMGA010094  | GSTe4                                 |
|                     | BGIBMGA010093  | GSTe5                                 |
|                     | BGIBMGA011658  | GSTo2                                 |
|                     | BGIBMGA011819  | GSTo1                                 |
|                     | BGIBMGA011820  | GSTo4                                 |
|                     | <b>BmGSTe7</b> | BmGSTe7                               |
| Pediculus humanus   | PHUM009630     | Sigma-GST                             |
|                     | PHUM097960     | Partial;Delta-GST                     |
|                     | PHUM189430     | Delta-GST                             |
|                     | PHUM189440     | Delta-GST                             |
|                     | PHUM236630     |                                       |
|                     | PHUM284550     | Sigma-GST                             |
|                     | PHUM284560     | Partial;Sigma-GST                     |
|                     | PHUM284770     | Sigma-GST                             |
|                     | PHUM333090     | Delta-GST                             |
|                     | PHUM454040     | Theta-GST                             |
|                     | PHUM530530     | Omega-GST                             |
| Nasonia vitripennis | XP_001605303   | GSTT2                                 |
|                     | XP_001608225   | GSTS1                                 |
|                     | XP_001607824   | Partial;GSTS22;Clusters;with S3,S8,S1 |
|                     | XP_001608207   | GSTD5                                 |
|                     | XP_001599411   | GSTS3                                 |
|                     | XP_001603942   | GSTS4                                 |
|                     | XP_001605098   | Partial;GSTS61                        |
|                     | XP_001605456   | GSTS5                                 |
|                     | XP_001600473   | GSTS7                                 |
|                     | XP_001600977   | GSTS8                                 |

|                           |              |                                                      |
|---------------------------|--------------|------------------------------------------------------|
|                           | XP_001600187 | GSTD4                                                |
|                           | XP_001600762 | GSTO1                                                |
|                           | XP_001601032 | GSTO2                                                |
|                           | XP_001606174 | GSTD3                                                |
|                           | XP_001607855 | GSTD1                                                |
|                           | XP_001603686 | GSTT1                                                |
|                           | XP_001603714 | GSTT3                                                |
|                           | TBLASTN      | GSTZ1                                                |
| <i>Apis mellifera</i>     | GB11466      | GSTO1                                                |
|                           | GB14372      | GSTS4                                                |
|                           | GB17672      | GSTZ1                                                |
|                           | GB18045      | GSTD1                                                |
|                           | GB30268      | Partial;GSTS21                                       |
|                           | GB16959      | GSTS1                                                |
|                           | GB10031      | GST                                                  |
|                           | GB19678      | Partial                                              |
|                           | GB12047      | GSTT1                                                |
| <i>Acyrtosiphon pisum</i> | ACYPI002127  | Sigma-GST                                            |
|                           | ACYPI002679  | Sigma-GST                                            |
|                           | ACYPI000794  | Sigma-GST                                            |
|                           | ACYPI009586  | Delta-GST                                            |
|                           | ACYPI009122  | Theta-GST                                            |
|                           | ACYPI007233  | Theta-GST                                            |
|                           | ACYPI008340  | Omega-GST                                            |
|                           | ACYPI008042  | Delta-GST                                            |
|                           | ACYPI009519  | Sigma-GST                                            |
|                           | ACYPI008550  | Delta-GST                                            |
|                           | ACYPI009326  | Sigma-GST                                            |
|                           | ACYPI52132   | Partial                                              |
|                           | ACYPI001068  | Delta-GST                                            |
|                           | ACYPI008657  | Delta-GST                                            |
|                           | ACYPI006899  | Delta-GST                                            |
|                           | ACYPI52302   | Delta-GST                                            |
|                           | ACYPI005620  | Delta-GST                                            |
| <i>Danaus plexippus</i>   | DPGLEAN14383 | GSTE3                                                |
|                           | DPGLEAN07422 | GST-containing FLYWCH zinc-finger protein, isoform B |
|                           | DPGLEAN00802 | GSTD1                                                |
|                           | DPGLEAN00407 | CG16936                                              |
|                           | DPGLEAN04701 | CG9363-A                                             |
|                           | DPGLEAN15774 | CG6776                                               |
|                           | DPGLEAN17330 | GSTE4                                                |
|                           | DPGLEAN10649 | GSTE7                                                |
|                           | DPGLEAN10896 | suppressor of ref(2)P sterility                      |

|                        |                     |                                    |
|------------------------|---------------------|------------------------------------|
|                        | DPGLEAN09486        | GSTE7                              |
|                        | DPGLEAN12507        | GSTD1-A                            |
|                        | DPGLEAN06785        | GSTS1-C                            |
|                        | DPGLEAN06787        | GSTS1-C                            |
|                        | DPGLEAN13104        | GSTE7                              |
|                        | DPGLEAN21737        | failed axon connections, isoform C |
|                        | DPGLEAN03237        | CG6776                             |
|                        | DPGLEAN03240        | CG6776                             |
|                        | DPGLEAN19980        | chloride intracellular channel     |
|                        | DPGLEAN02728        | CG4623                             |
|                        | DPGLEAN04969        | CG9362                             |
|                        | DPGLEAN02611        | GSTS1-C                            |
|                        | DPGLEAN04127        | CG9393                             |
|                        | DPGLEAN02423        | CG1702-B                           |
|                        | DPGLEAN01745        | GSTS1-C                            |
|                        | DPGLEAN01768        | CG17639-A                          |
|                        | <b>DPGLEAN14398</b> | GSTE1                              |
| Caenorhabditis elegans | CeGST43             |                                    |
|                        | CeGST42             |                                    |
|                        | CeY53G8B1           |                                    |
|                        | CeY53F4B33          |                                    |
|                        | CeY53F4B29          |                                    |
| Homo sapiens           | HsGSTA3             |                                    |
|                        | HsGSTA2             |                                    |
|                        | HsGSTA1             |                                    |
